# Supplementary material
Source: publisher figshare collection journal article supplement (https://acs.figshare.com/ndownloader/files/5174116)
Supplement: Supplementary file 1 [file 5174116]

## Supporting Information

### **Scandium Ion-Promoted Photoinduced Electron Transfer from Electron Donors to Acridine and Pyrene. Essential Role of Scandium Ion in Photocatalytic Oxygenation of Hexamethylbenzene**

Shunichi Fukuzumi,<sup>\*</sup> Junpei Yuasa, Naoya Satoh, and Tomoyoshi Suenobu

*Department of Material and Life Science, Graduate School of Engineering, Osaka University,  
CREST, Japan Science and Technology Agency (JST), Suita, Osaka 565-0871, Japan*

\* To whom correspondence should be addressed.

E-mail: fukuzumi@chem.eng.osaka-u.ac.jp

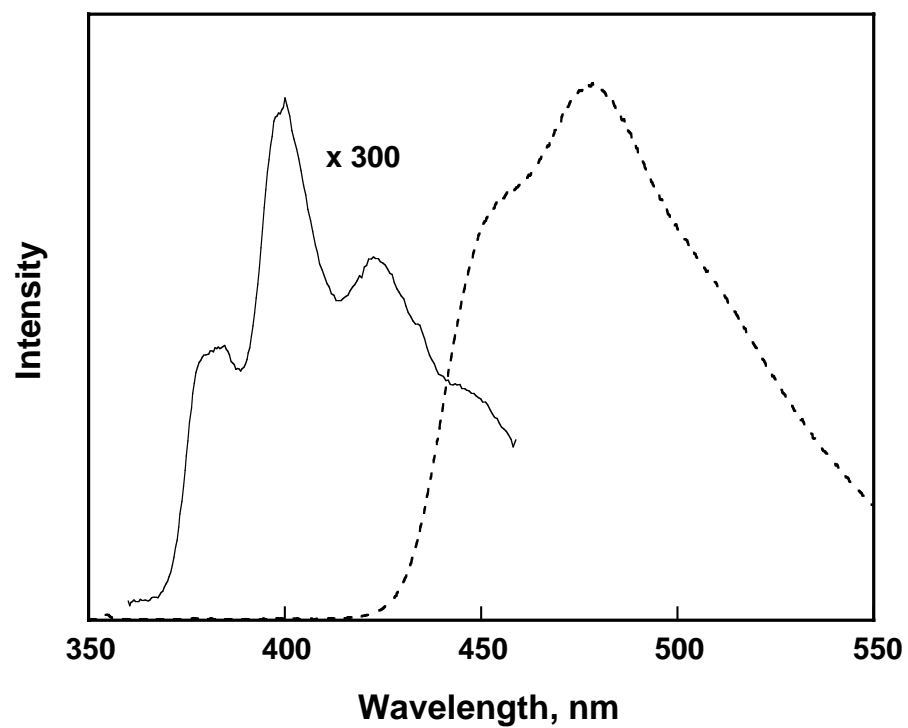

**Figure S1.** Fluorescence spectra of acridine (AcrN) ( $3.5 \times 10^{-5}$  M) in the absence (solid line) and in the presence of  $\text{Sc}(\text{OTf})_3$  ( $2.0 \times 10^{-3}$  M, dashed line) in deaerated MeCN at 298 K.

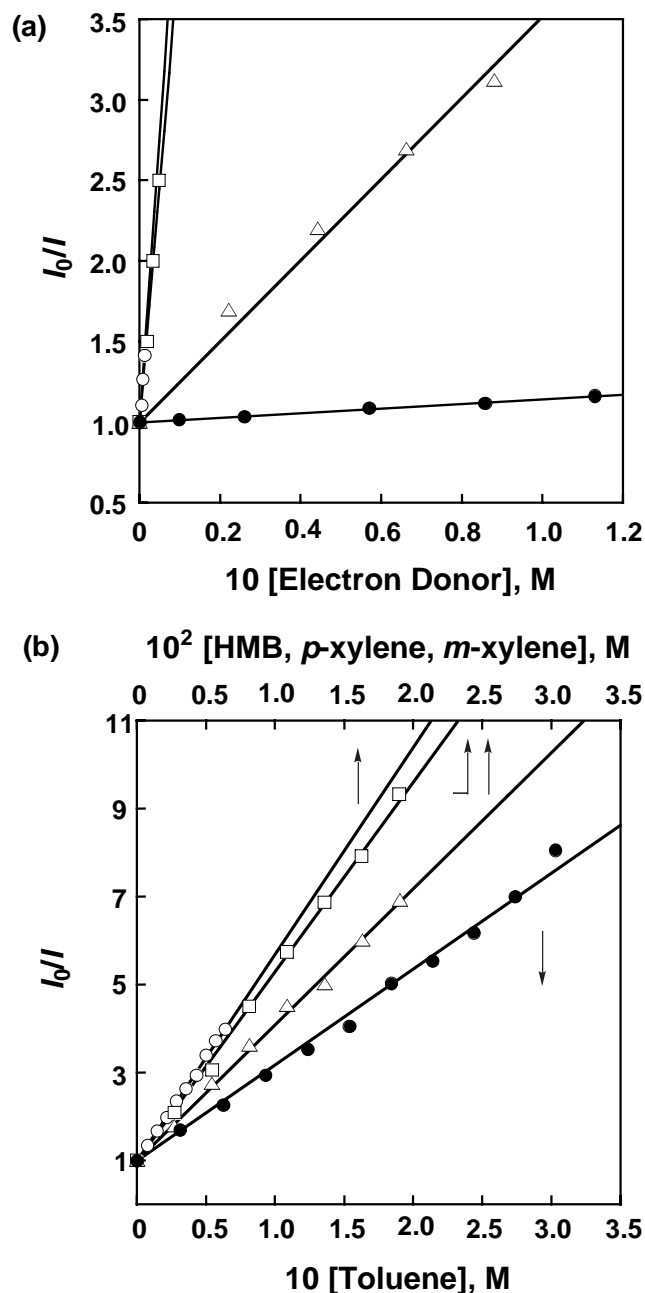

**Figure S2.** Stern-Volmer plots for the fluorescence quenching of AcrN ( $1.0 \times 10^{-4}$  M) by (a) 1,1'-dimethylferrocene (○), 10-methyl-9,10-dihydroacridine (□), 1,2,4-trimethoxybenzene (△) and 1,4-dimethoxybenzene (●) in deaerated MeCN at 298 K and (b) hexamethylbenzene (HMB; ○),  $p$ -xylene (□),  $m$ -xylene (△), and toluene (●) in the presence of  $\text{Sc}(\text{OTf})_3$  ( $4.0 \times 10^{-2}$  M) in deaerated MeCN at 298 K.

(a)  $10^3$  [DMFc, DMA or 1,2,4-Trimethoxybenzene], M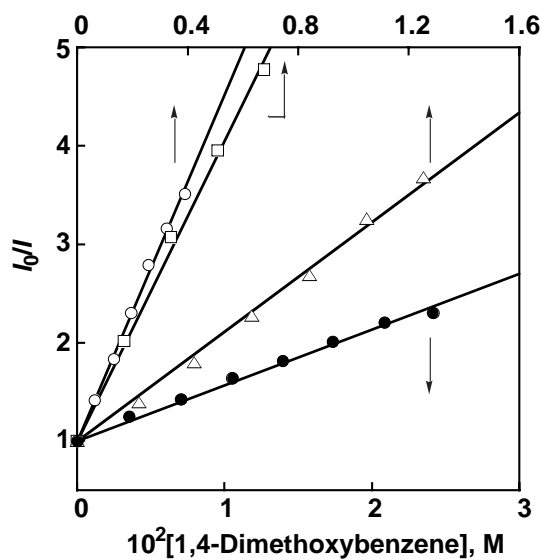

(b)

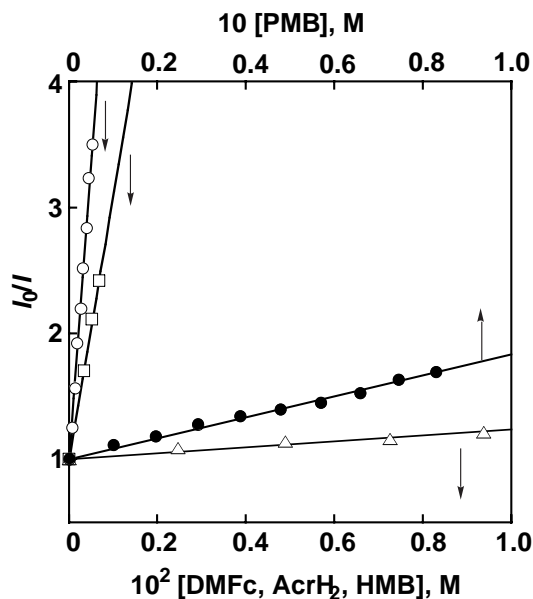

**Figure S3.** Stern-Volmer plots for the fluorescence quenching of Py ( $1.3 \times 10^{-6}$  M) by (a) 1,1'-dimethylferrocene (DMFc,  $\circ$ ), *N,N*-dimethylaniline (DMA,  $\square$ ), 1,2,4-trimethoxybenzene ( $\triangle$ ) and 1,4-dimethoxybenzene ( $\bullet$ ) in deaerated MeCN at 298 K and (b) 1,1'-dimethylferrocene ( $\circ$ ), 10-methyl-9,10-dihydroacridine (AcrH<sub>2</sub>,  $\square$ ), hexamethylbenzene (HMB,  $\triangle$ ) and pentamethylbenzene (PMB,  $\bullet$ ) in the presence of Sc(OTf)<sub>3</sub> ( $4.0 \times 10^{-2}$  M) in deaerated MeCN at 298 K.

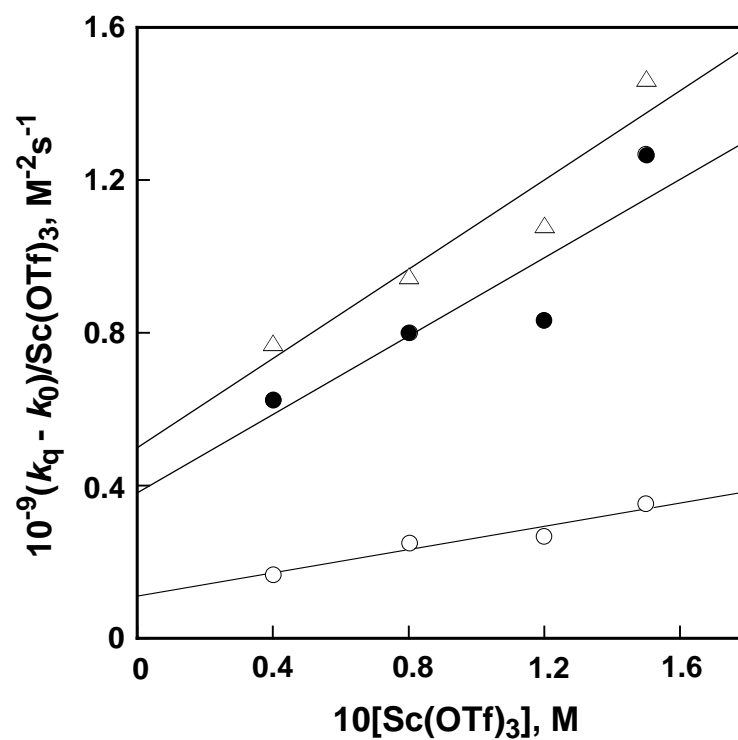

**Figure S4.** Plots of  $(k_q - k_0)/[Sc(OTf)_3]$  vs  $[Sc(OTf)_3]$  for the fluorescence quenching of Py ( $1.3 \times 10^{-6}$  M) by 1,2,3,5-tetramethylbenzene (○), 1,2,4,5-tetramethylbenzene (●) and pentamethylbenzene (△) in the presence of Sc(OTf)<sub>3</sub> in deaerated MeCN at 298 K.

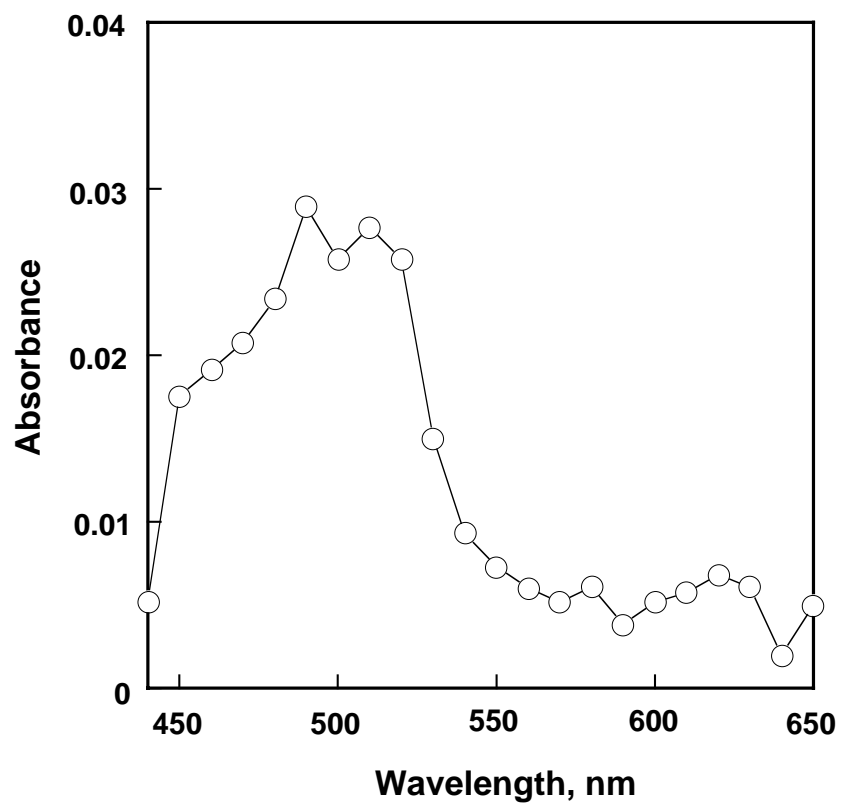

**Figure S5.** Transient absorption spectrum in the photoreduction of AcrN ( $6.6 \times 10^{-5}$  M) by ferrocene ( $1.2 \times 10^{-2}$  M) in the presence of  $\text{Sc}(\text{OTf})_3$  ( $9.7 \times 10^{-3}$  M) at  $1\mu\text{s}$  after laser irradiation at  $\lambda = 355$  nm in deaerated MeCN at 298 K.

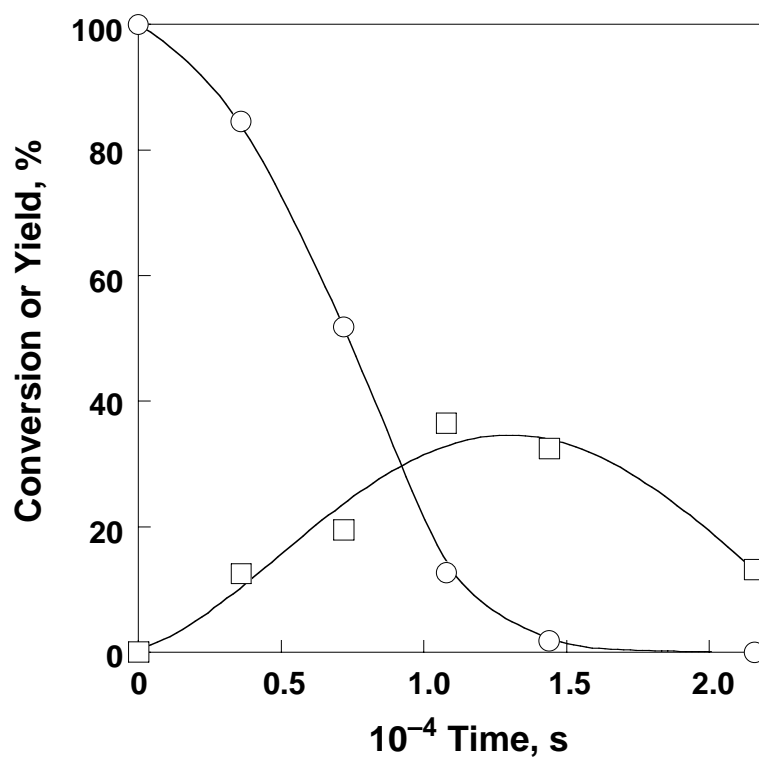

**Figure S6.** Plots of the conversion of HMB (○) and the yield of pentamethylbenzyl alcohol (□) vs time determined based on the  $^1\text{H}$ -NMR spectral change observed in the photosensitized oxygenation of HMB ( $2.0 \times 10^{-3}$  M) in the presence of Py ( $2.0 \times 10^{-5}$  M) and  $\text{Sc}(\text{OTf})_3$  ( $4.0 \times 10^{-2}$  M) under irradiation of UV-visible light ( $\lambda > 300$  nm) in  $\text{O}_2$ -saturated MeCN at 298 K.

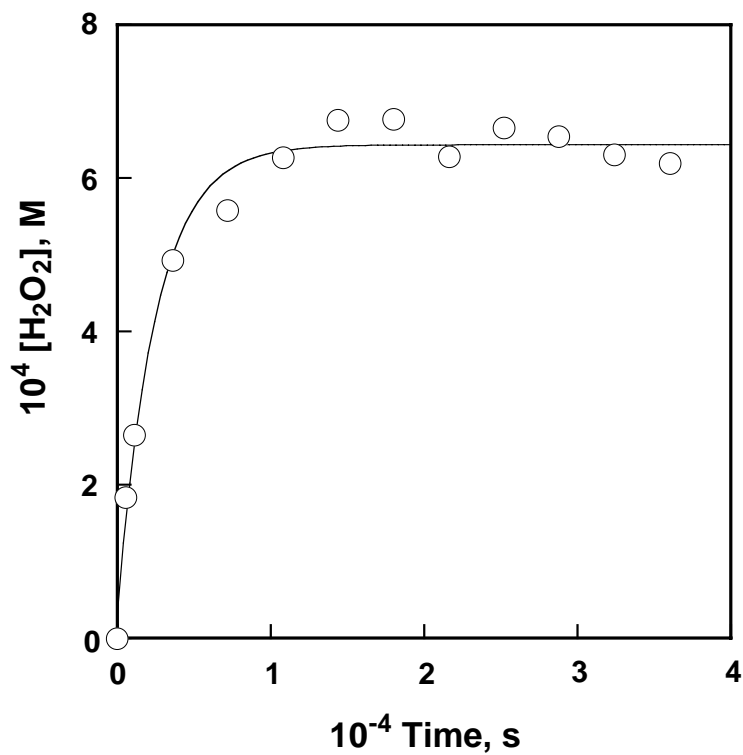

**Figure S7.** Plot of concentration of hydrogen peroxide vs reaction time in the photosensitized oxygenation of HMB ( $2.0 \times 10^{-3}$  M) in the presence of AcrN ( $2.0 \times 10^{-5}$  M) and Sc(OTf)<sub>3</sub> ( $4.0 \times 10^{-2}$  M) under irradiation of UV-visible light ( $\lambda > 300$  nm) in O<sub>2</sub>-saturated MeCN at 298 K.
